# Supplementary material for: Microarray analysis and real-time PCR assay developed to find biomarkers for mercury-contaminated soil
Source: Royal Society of Chemistry journal article supplement (doi:10.1039/c6tx00210b), 2016-01-01
Supplement: c6tx00210b2.xlsx [file c6tx00210b2.xlsx]

## Sheet: Sheet1
ProbeID	Pvalues	Fold change	Normalized signal values				Gene name
			Replication 1	Replication 2	Replication 3	Mean
A_96_P012601	0.011353	47.8369	8.2558	6.17284	8.15964	7.52943	ripening-related ACC synthase 2
A_96_P076939	0.000219881	15.289	6.82472	6.16327	6.85494	6.61431	pectinesterase 40
A_96_P045476	0.0420779	11.5512	9.43946	7.31154	9.89572	8.88224	probable glutathione S-transferase parA
A_96_P020896	0.0223455	10.0754	9.50843	8.03794	9.5043	9.01689	nucleobase-ascorbate transporter 12
A_96_P134407	0.00779568	8.30648	5.73195	5.3778	5.74764	5.61913	Leucine-rich repeat-containing protein
A_96_P228059	0.010579	7.89799	7.56963	6.34444	7.4182	7.11075	monothiol glutaredoxin-S1-like
A_96_P204619	0.00314868	7.32274	5.02812	5.38861	5.00947	5.14207	UDP-glucosyl transferase 73C
A_96_P201779	0.00231875	6.66063	7.01707	6.09194	6.65072	6.58658	sterile alpha motif and leucine zipper containing kinase AZK
A_96_P052566	0.00640881	5.82132	7.23243	6.38632	7.08416	6.90097	putative pectate lyase 8
A_96_P010486	0.017606	5.8064	11.734	11.8038	11.678	11.7386	chlorophyll a-b binding protein
A_96_P054641	0.019559	4.3898	8.25717	7.32331	8.18343	7.92131	geranylgeranyl pyrophosphate synthase 1
A_96_P154716	0.000244632	4.35763	7.22647	7.54578	7.2089	7.32705	O-acyltransferase (WSD1-like) family protein
A_96_P121997	0.0216768	3.63227	11.2937	10.3741	11.4095	11.0258	cytochrome P450 71A25
A_96_P175119	0.0143017	3.5291	5.22849	5.79304	6.22071	5.74742	protein phosphatase
A_96_P000883	1.22968e-05	3.47627	11.5909	11.6503	11.6768	11.6393	photosystem II light harvesting complex protein 2.1
A_96_P136642	0.0344297	3.46002	6.16506	5.47403	5.9959	5.87833	auxin-responsive GH3 family protein
A_96_P211189	0.0300334	3.44576	5.83208	6.17068	6.04808	6.01695	ABC transporter F family member 1
A_96_P197874	0.016359	3.35798	9.20912	9.60265	9.15105	9.32094	NAC domain containing protein 71
A_96_P088464	0.00651365	3.24881	8.06632	7.38277	7.75127	7.73346	putative gibberellin-regulated protein
A_96_P201909	0.00110903	3.17628	6.84966	6.62865	7.00096	6.82642	Erythronate-4-phosphate dehydrogenase-like protein
A_96_P212754	0.0254685	3.1036	9.37229	8.70076	9.55254	9.20853	transcription elongation factor SPT6
A_96_P197094	0.0259624	3.06428	7.2042	7.30106	7.10794	7.2044	transducin/WD40 domain-containing protein
A_96_P215559	1.53425e-06	3.02842	10.0997	10.1255	10.0711	10.0988	chlorophyll a-b binding protein CP26
A_96_P052036	0.00503768	3.01938	10.1556	10.7853	10.1541	10.365	putative cysteine proteinase
A_96_P123807	0.0348247	2.9979	6.82314	6.65313	6.5564	6.67756	zinc finger protein CONSTANS-LIKE 16
A_96_P135942	0.0265863	2.99591	5.28674	5.60283	5.27519	5.38826	glyceraldehyde-3-phosphate dehydrogenase A
A_96_P044136	0.00662672	2.99164	7.79996	7.26907	7.45604	7.50836	F-box/kelch-repeat protein OR23
A_96_P232869	0.0011362	2.90761	8.60404	9.00048	8.59677	8.73376	transcription factor bHLH63
A_96_P121672	0.00465171	2.89223	11.9124	11.4105	11.8339	11.7189	cysteine-rich receptor-like protein kinase 10
A_96_P036906	0.0422255	2.84236	6.23413	5.25254	6.22857	5.90508	HXXXD-type acyl-transferase-like protein
A_96_P135167	0.000374838	2.8306	7.72672	7.82591	7.6939	7.74884	chlorophyll a-b binding protein 4
A_96_P148711	0.00606038	2.80426	7.679	8.06221	7.75985	7.83369	PsbP-like protein 2
A_96_P146366	0.0117624	2.76905	7.12531	6.41168	7.08458	6.87386	transcription factor bHLH137
A_96_P084924	0.00703915	2.73724	9.14043	8.50223	9.12965	8.9241	protein phosphatase 2C 37
A_96_P117097	0.00664656	2.69966	8.81936	8.19875	8.81499	8.61103	protein PHLOEM protein 2-LIKE A10
A_96_P130617	0.0063118	2.6867	6.51558	5.83046	6.31167	6.21924	transcription factor bHLH130
A_96_P231604	0.00372065	2.65574	7.84796	7.90302	7.88239	7.87779	hypothetical protein
A_96_P228104	0.000355757	2.65161	8.45258	8.28757	8.52632	8.42216	thioredoxin-like 1-1
A_96_P059291	0.000270726	2.61522	7.75069	7.50551	7.52763	7.59461	transcription factor TCP14
A_96_P229399	0.00295034	2.60344	5.78436	5.72577	6.2266	5.91224	GTP1/OBG family protein
A_96_P102709	0.0291536	2.56364	9.09362	8.20829	9.09783	8.79991	hypothetical protein
A_96_P087819	0.000461177	2.54038	10.1534	10.4368	10.3002	10.2968	chlorophyll a-b binding protein 1
A_96_P187869	0.00171106	2.50657	10.0466	9.60919	9.72055	9.79212	exocyst subunit exo70 family protein H7
A_96_P189669	0.011754	2.50288	5.32513	5.57227	5.5688	5.48874	SWI/SNF complex component SNF12-like protein
A_96_P213224	0.00411601	2.50112	11.0697	10.7814	11.0735	10.9749	homeobox-leucine zipper protein ATHB-7
A_96_P000226	0.00793123	2.4981	7.52113	7.15454	7.62874	7.4348	proline transporter 2
A_96_P212919	0.00182342	2.48595	8.14589	7.79151	8.03725	7.99155	histone-lysine N-methyltransferase, H3 lysine-9 specific SUVH3
A_96_P017071	0.036145	2.47571	11.4633	10.6957	11.4376	11.1989	hypothetical protein
A_96_P230859	0.000356537	2.4727	8.27928	8.33631	8.12675	8.24745	subtilisin-like serine protease 2
A_96_P208699	0.000862178	2.46232	10.429	10.6871	10.4169	10.511	hypothetical protein
A_96_P128433	0.00491165	2.45187	7.60735	7.21235	7.70028	7.50666	putative leucine-rich repeat receptor-like protein
A_96_P163216	0.000843369	2.4517	13.7016	13.3448	13.4489	13.4984	nuclear transport factor 2 and RNA recognition motif domain-containing protein
A_96_P146806	0.00422605	2.44781	8.69568	8.19822	8.6612	8.51836	cell division protease ftsH-6
A_96_P009816	0.00109567	2.42653	10.6441	10.9891	10.7007	10.7779	BEL1-like homeodomain 1
A_96_P245285	0.0019769	2.42358	6.94215	6.49519	6.67724	6.70486	putative nucleoredoxin 1
A_96_P259597	0.0128462	2.40807	5.62883	5.99973	5.33346	5.65401	pentatricopeptide repeat-containing protein
A_96_P074049	0.00123359	2.40642	9.67661	9.56962	9.56391	9.60338	thioredoxin-like protein CDSP32
A_96_P066721	0.000213522	2.35049	9.52082	9.59614	9.60276	9.57324	hypothetical protein
A_96_P149951	0.00428	2.34953	8.31832	8.67258	8.22864	8.40651	protein trichome birefringence-like 41
A_96_P224829	0.0154864	2.34744	7.40073	7.97792	7.89624	7.7583	peptide methionine sulfoxide reductase B1
A_96_P035001	0.00025952	2.33879	9.17579	9.08834	9.09988	9.12134	protein indeterminate(ID)-domain 11
A_96_P114557	0.0241442	2.32926	10.5071	9.83598	10.4307	10.2579	E3 ubiquitin-protein ligase ATL41
A_96_P148516	0.00207788	2.3087	5.77191	5.7739	5.69291	5.74624	photosystem I reaction center subunit N
A_96_P072289	0.00196924	2.27899	8.72892	8.53053	8.62318	8.62754	putative epoxide hydrolase
A_96_P150051	0.00722563	2.24464	8.88659	8.48736	8.92086	8.76494	hypothetical protein
A_96_P129222	0.00673365	2.23945	12.711	12.2531	12.5885	12.5175	ABC transporter C family member 4
A_96_P052466	0.0165823	2.23588	13.3106	13.0154	13.2772	13.2011	putative F-box/kelch-repeat protein
A_96_P113107	0.0179661	2.22539	7.91014	7.7828	7.95394	7.8823	S-locus lectin protein kinase-like protein
A_96_P124602	0.0162264	2.22375	8.84474	8.85797	8.75797	8.82023	protein CONSTANS-like 4
A_96_P072799	0.00514649	2.22079	7.60619	7.95499	7.46288	7.67469	light-harvesting complex I chlorophyll a/b binding protein 3
A_96_P031196	0.00215838	2.20355	13.8278	13.4991	13.7236	13.6835	cytochrome b561/ferric reductase transmembrane family protein
A_96_P068476	0.000119254	2.18969	10.1768	10.1052	10.2955	10.1925	ribonucleoprotein 1
A_96_P118552	0.0077191	2.18952	7.46925	7.08525	7.24046	7.26498	adenine/guanine permease AZG1
A_96_P016696	0.000262555	2.17669	12.366	12.2051	12.4044	12.3252	protein SEUSS-like 2
A_96_P223619	0.0176186	2.17199	6.22973	5.48908	5.82321	5.84734	developmental protein SEPALLATA 1
A_96_P063176	0.0172369	2.16893	9.04994	9.05362	9.05708	9.05355	E3 ubiquitin-protein ligase ATL23
A_96_P148956	0.000589629	2.167	12.9196	12.7533	12.6329	12.7686	serine carboxypeptidase-like 26
A_96_P072964	3.20875e-05	2.13474	16.1934	16.2111	16.0899	16.1648	putative peroxisomal (S)-2-hydroxy-acid oxidase 2
A_96_P134532	0.00915622	2.126	8.67994	8.92223	8.48197	8.69471	3-ketoacyl-CoA synthase 3
A_96_P032716	0.0262963	2.1195	7.98763	7.34154	7.90843	7.74587	hypothetical protein
A_96_P130327	0.00080089	2.1122	10.0471	9.95659	9.89066	9.96477	serine carboxypeptidase-like 17
A_96_P233564	0.00132327	2.11214	9.10183	8.98288	9.08542	9.05671	ALA-interacting subunit 5
A_96_P233459	0.012004	2.11004	9.18161	9.50867	9.01939	9.23655	aquaporin PIP1-3
A_96_P212139	0.0100936	2.1093	7.8702	8.17812	7.86585	7.97139	major facilitator protein
A_96_P200669	0.00901852	2.09521	7.2247	6.89719	6.74381	6.95523	alcohol dehydrogenase-like 1
A_96_P048681	0.00573355	2.08994	11.1674	11.24	11.1753	11.1942	nodulin MtN3-like protein
A_96_P130537	0.00145154	2.08914	10.9911	10.7842	11.1047	10.96	U6 snRNA-associated Sm-like protein LSm4
A_96_P259222	0.0477869	2.08614	9.54879	8.74512	9.42674	9.24022	protein IQ-domain 11
A_96_P099294	0.000120453	2.0861	7.51959	7.65467	7.49658	7.55695	Rossmann-fold NAD(P)-binding domain-containing protein
A_96_P107739	0.00872383	2.07952	12.1397	11.6233	11.9795	11.9142	cytochrome P450, family 81, subfamily D, polypeptide 8
A_96_P136137	0.0042648	2.0494	9.92903	10.1005	9.75194	9.92716	ABC transporter G family member 22
A_96_P100334	0.000404365	2.04893	10.2933	10.4298	10.1924	10.3052	transcription factor PIF1
A_96_P012046	0.00195438	2.04472	6.8895	6.68648	7.00689	6.86096	receptor like protein 6
A_96_P202474	0.00194846	2.04351	8.21746	8.11857	8.10078	8.1456	ribosomal protein S1-like RNA-binding domain-containing protein
A_96_P070554	0.0335414	2.03021	7.02295	6.26904	6.43653	6.57617	F-box/LRR-repeat protein
A_96_P200404	0.0110883	2.02362	5.61695	5.6551	5.77036	5.6808	anaphase-promoting complex subunit 6
A_96_P129642	0.00131338	2.01727	11.0571	11.3403	11.0635	11.1536	homeobox protein knotted-1-like 1
A_96_P043716	0.000931953	2.01532	9.46239	9.29328	9.4204	9.39203	coatomer subunit beta'-2
A_96_P218794	0.00142667	2.01457	10.5334	10.3735	10.2283	10.3784	chlorophyll a-b binding protein CP29.1
A_96_P143586	0.00705072	2.01335	12.8879	12.4799	12.9372	12.7683	catalytic/ cation binding / hydrolase
A_96_P254307	0.00204537	2.00856	7.21807	6.97514	6.90376	7.03232	hypothetical protein
A_96_P022956	0.000137332	2.00419	11.5323	11.7019	11.5749	11.603	hypothetical protein
A_96_P099284	0.0127747	2.00282	7.79192	8.38026	8.04262	8.0716	putative aquaporin TIP3-2
A_96_P000251	0.0107405	2.00084	7.05295	6.98152	7.18756	7.07401	gibberellin 20 oxidase 1
A_96_P100964	0.000179856	0.499649	7.85334	7.89771	7.75858	7.83654	putative xyloglucan glycosyltransferase 12
A_96_P054956	3.15183e-05	0.497878	8.62703	8.71081	8.74188	8.69324	heat stress transcription factor A-4a
A_96_P063096	0.030616	0.497143	6.58138	6.38215	6.51623	6.49325	RING/U-box domain-containing protein
A_96_P042531	0.0108592	0.496733	9.50935	9.86982	9.47047	9.61655	50S ribosomal protein L24
A_96_P062331	0.0198291	0.496076	14.0131	13.3777	13.8921	13.761	putative aquaporin NIP5-1
A_96_P128582	0.00460945	0.495612	7.87122	8.03413	7.79266	7.89934	hypothetical protein
A_96_P097444	0.0115737	0.495402	9.34652	8.94884	9.2141	9.16982	cupredoxin-like protein
A_96_P246832	0.0167579	0.494984	11.4603	11.4292	11.3336	11.4077	transducin/WD-40 repeat-containing protein
A_96_P157701	0.00271592	0.492285	6.70984	6.55318	6.92415	6.72906	FAD/NAD(P)-binding oxidoreductase family protein
A_96_P107749	0.000936021	0.49176	9.51463	9.49673	9.43198	9.48111	COBRA-like protein 7
A_96_P034726	0.025583	0.491613	13.4565	13.4465	13.5416	13.4815	scarecrow-like protein 34
A_96_P099439	0.000387768	0.488736	9.20982	9.39084	9.25707	9.28591	ZIP metal ion transporter
A_96_P076049	0.0025359	0.484753	11.746	11.5872	11.5528	11.6287	glutathione S-transferase tau 7
A_96_P093389	0.00760619	0.483867	9.6178	9.82507	10.0582	9.83368	xyloglucan glycosyltransferase 4
A_96_P176039	0.0374136	0.482116	5.11174	4.17088	4.56606	4.61623	putative WRKY transcription factor 72
A_96_P003911	0.00121484	0.481996	11.1084	11.4347	11.2973	11.2801	BAX inhibitor-1 motif-containing protein
A_96_P067426	0.00298568	0.480983	4.09079	4.46366	4.36892	4.30779	SNF1-related protein kinase catalytic subunit alpha KIN10
A_96_P183679	0.000218573	0.480521	12.0042	12.107	12.0548	12.0553	tetraspanin8
A_96_P185909	0.00957796	0.479712	12.4682	12.6079	12.4388	12.505	myb domain protein 77
A_96_P215079	0.0045944	0.478942	12.1745	12.499	12.2296	12.3011	hypothetical protein
A_96_P259052	0.0373843	0.476077	7.81375	7.67002	7.8308	7.77152	ankyrin repeats-containing protein
A_96_P120237	0.028221	0.475452	6.6765	6.73793	6.933	6.78248	hydrolase, alpha/beta fold family protein
A_96_P231514	0.0120469	0.473927	6.99978	6.58531	6.70308	6.76272	Type I inositol-1,4,5-trisphosphate 5-phosphatase 2
A_96_P250597	0.00203032	0.473358	4.91644	5.18849	4.83158	4.97883	ATP binding microtubule motor family protein
A_96_P047686	7.51941e-05	0.473241	6.23449	6.21244	6.34159	6.26284	transcription factor bHLH49
A_96_P189109	3.85237e-05	0.473118	11.2341	11.3666	11.279	11.2932	transcription factor bHLH93
A_96_P212739	0.0339366	0.469985	6.40474	6.95263	7.14429	6.83389	proteolysis 6
A_96_P010631	0.0126855	0.461398	13.982	13.5574	13.8874	13.8089	copper chaperone
A_96_P084929	0.0281751	0.458291	6.90707	7.39331	7.0498	7.11673	SAUR-like auxin-responsive protein family
A_96_P013926	0.0255052	0.456201	11.4211	10.8327	11.4287	11.2275	ethylene-responsive transcription factor 1A
A_96_P187754	0.0101485	0.455022	5.73946	6.13875	5.5519	5.81003	alpha-crystallin domain of heat shock protein-containing protein
A_96_P209379	0.00590326	0.450997	6.77071	6.51259	6.9617	6.74833	formin-like protein 8
A_96_P062286	0.0108693	0.448047	9.16197	9.40607	9.2068	9.25828	Xylem cysteine proteinase 1
A_96_P228269	0.00440717	0.447548	4.90714	4.38769	4.66086	4.6519	Subtilisin-like serine endopeptidase family protein
A_96_P000811	6.49971e-05	0.447102	11.2657	11.3061	11.2349	11.2689	copper chaperone for SOD1
A_96_P017696	0.0105052	0.442437	3.47277	3.93208	4.00232	3.80239	serine/threonine-protein kinase MHK
A_96_P219454	0.0128546	0.441093	8.19576	8.64416	7.91589	8.25194	chaperonin-60alpha
A_96_P161676	0.0181221	0.436126	5.50055	5.99632	5.40211	5.63299	protein dicer-like 2
A_96_P106014	0.00235073	0.433921	12.781	12.4803	12.7698	12.677	hypothetical protein
A_96_P031476	0.00259595	0.433519	10.8931	10.6002	10.9432	10.8122	cysteine/histidine-rich C1 domain-containing protein
A_96_P224249	0.0033763	0.424163	6.58157	6.96318	6.50359	6.68278	transcription factor TCP2
A_96_P198409	0.0236072	0.42411	3.91139	3.86957	3.21965	3.66687	glucan endo-1,3-beta-glucosidase 12
A_96_P200869	0.0131525	0.424006	7.80313	7.23243	7.71978	7.58512	carboxyesterase 20
A_96_P015261	0.0467092	0.423133	11.3817	12.2491	11.3592	11.6633	chaperonin CPN60
A_96_P033896	0.00839901	0.422137	6.20908	6.14564	6.12371	6.15948	MADS-box protein SVP
A_96_P087974	0.0168649	0.420667	6.53792	5.97753	6.64468	6.38671	hypothetical protein
A_96_P144406	0.0395477	0.416275	6.63657	6.69229	6.53385	6.6209	xyloglucan:xyloglucosyl transferase
A_96_P058336	0.0388978	0.415076	4.57234	4.80055	5.0008	4.79123	Transmembrane amino acid transporter family protein
A_96_P000476	0.0200494	0.413891	11.588	12.3187	11.4916	11.7994	putative aquaporin PIP1-5
A_96_P229909	0.0146407	0.41238	5.53044	4.93433	5.48775	5.31751	haloacid dehalogenase-like hydrolase domain-containing protein
A_96_P207329	0.00802379	0.405044	13.6427	13.8537	13.5466	13.681	aquaporin TIP1-1
A_96_P125977	0.00328052	0.397844	6.1052	5.57551	5.71149	5.7974	branched-chain-amino-acid aminotransferase-like protein 3
A_96_P020106	0.00690599	0.397659	8.88517	9.05091	8.74552	8.89387	isoflavone reductase-like protein
A_96_P098734	0.0014878	0.390527	6.59338	6.96188	6.56721	6.70749	N-terminal domain of eukaryotic serine threonine kinase-containing protein
A_96_P258827	0.000612668	0.389277	5.20619	5.04186	5.29666	5.18157	glyoxal oxidase-related protein
A_96_P245555	0.00238392	0.386951	4.45934	4.33476	3.97145	4.25519	Floral homeotic protein APETALA 2
A_96_P231494	0.00363147	0.381754	4.28672	3.74059	3.86129	3.96287	putative inactive receptor kinase
A_96_P104361	0.00022992	0.380574	12.5581	12.3104	12.4529	12.4405	glutamine synthetase cytosolic isozyme 1-2
A_96_P189589	0.015205	0.376666	5.41806	5.63619	5.34232	5.46552	cellulose synthase A catalytic subunit 4 [UDP-forming]
A_96_P118022	7.04948e-05	0.372113	6.25723	6.34183	6.13196	6.24367	nucleotide/sugar transporter-like protein
A_96_P016926	0.00592592	0.366205	8.64584	9.06078	8.54881	8.75181	phosphoenolpyruvate carboxylase-like protein
A_96_P100019	0.000731283	0.359571	9.53724	9.78907	9.59394	9.64008	putative DNA-binding protein
A_96_P158341	0.0201796	0.352641	7.88981	7.73457	7.76888	7.79775	BTB/POZ domain-containing protein
A_96_P058016	0.00442249	0.351764	7.49219	7.00263	7.38946	7.29476	zinc transporter 2
A_96_P072689	0.016253	0.339577	4.7365	5.54952	4.63214	4.97272	1-aminocyclopropane-1-carboxylate synthase 9
A_96_P091279	0.00577578	0.318698	12.0714	12.4864	12.1065	12.2214	Phosphate-responsive 1 family protein
A_96_P035251	0.0452706	0.315648	6.33126	6.23914	6.5699	6.3801	U-box domain-containing protein 13
A_96_P182934	0.000471025	0.306373	4.68519	5.0946	4.85834	4.87938	UDP-D-glucuronate 4-epimerase 1
A_96_P213564	0.00387515	0.299068	6.285	6.54485	5.81015	6.21333	expansin-A3
A_96_P097874	0.0155196	0.298346	9.74949	9.00781	9.62136	9.45955	C2H2 and C2HC zinc finger domain-containing protein
A_96_P021116	0.00042901	0.298301	13.896	13.7816	14.127	13.9348	putative aquaporin TIP2-2
A_96_P092769	0.0116299	0.296813	11.9037	12.6516	11.8357	12.1303	aquaporin PIP2-7
A_96_P016631	0.00893149	0.288843	13.805	13.4293	13.5926	13.609	aquaporin TIP1-3
A_96_P040816	0.00264276	0.288716	9.51875	9.4342	9.53028	9.49441	stress-associated protein 11
A_96_P229619	0.00081435	0.274992	9.90379	10.197	9.87885	9.99322	probable calcium-binding protein CML18
A_96_P084094	0.0193572	0.27259	9.88676	10.7239	10.9461	10.5189	glutamine synthetase cytosolic isozyme 1-1
A_96_P132187	0.0251122	0.264984	4.49596	3.87449	3.26004	3.87683	Regulator of Vps4 activity in the MVB pathway protein
A_96_P122730	0.0140146	0.253573	3.19646	3.57981	4.25404	3.67677	GATA type zinc finger transcription factor family protein
A_96_P054346	0.00127141	0.243141	8.60629	8.19769	8.31477	8.37292	metalloendoproteinase 1
A_96_P080540	0.00734935	0.237793	2.37706	2.22131	2.88967	2.49601	putative polygalacturonase non-catalytic subunit JP650
A_96_P223344	0.0376953	0.230182	4.45615	4.98333	4.52526	4.65491	putative calcium-binding protein CML15
A_96_P260192	0.00846246	0.228642	8.9789	8.52734	9.08912	8.86512	leucine-rich repeat extensin-like protein 6
A_96_P043226	0.00875378	0.223757	4.13693	5.19491	4.35827	4.56337	protein SKU5 similar 17
A_96_P196569	0.0175957	0.210843	5.32667	4.53564	5.10517	4.98916	S-adenosylmethionine decarboxylase
A_96_P103574	0.000365423	0.168726	4.9846	5.28674	4.95891	5.07675	hypothetical protein
A_96_P020931	0.042539	0.148799	6.95263	7.65754	7.19709	7.26909	1-aminocyclopropane-1-carboxylate oxidase
A_96_P160586	0.00531817	0.104223	4.27686	5.21583	4.50745	4.66671	hypothetical protein
A_96_P160281	0.00503032	0.0307638	3.01482	4.7486	3.4495	3.73764	peroxidase 64
